# Supplementary material
Source: publisher site journal article supplement (https://www.dovepress.com/article/225829)
Supplement: Supplementary file 1 [file get_supplementary_file.php]

|  |  | The molecular size of RAPD amplicon (bp)a | | | | | | | | | | | | | | | |  |  |
| --- | --- | --- | --- | --- | --- | --- | --- | --- | --- | --- | --- | --- | --- | --- | --- | --- | --- | --- | --- |
| RAPD type | No. of bands | 1100 | 1080 | 1000 | 900 | 840 | 800 | 720 | 700 | 640 | 600 | 515 | 500 | 425 | 400 | 386 | 300 | No. of isolates (%) | Similarityb |
| 1 | 4 |  |  |  |  |  |  | I |  |  |  | I |  | I |  | I |  | 7(53.8) | 94% |
| 2 | 5 |  |  |  |  | I |  | I |  |  |  | I |  | I |  | I |  | 4 (30.8) | 73% |
| 3 | 3 |  |  |  |  |  |  |  |  |  |  | I |  | I |  | I |  | 1(7.7) | 38% |
| 4 | 5 |  | I |  |  |  |  | I |  |  |  | I |  | I |  | I |  | 1 (7.7) | 38% |

Figure1 Normalized graph showing the details of RAPD profiles of toxigenic *C. difficile* strains.

Legend:The dark black bands are the major bands and the faded black bands are minor bands. a base pair, bThe similarity was calculated using the Dice coefficient and represented by UPGMA clustering.
